# Supplementary material
Source: PubMed Central journal article supplement (PMC9988242)

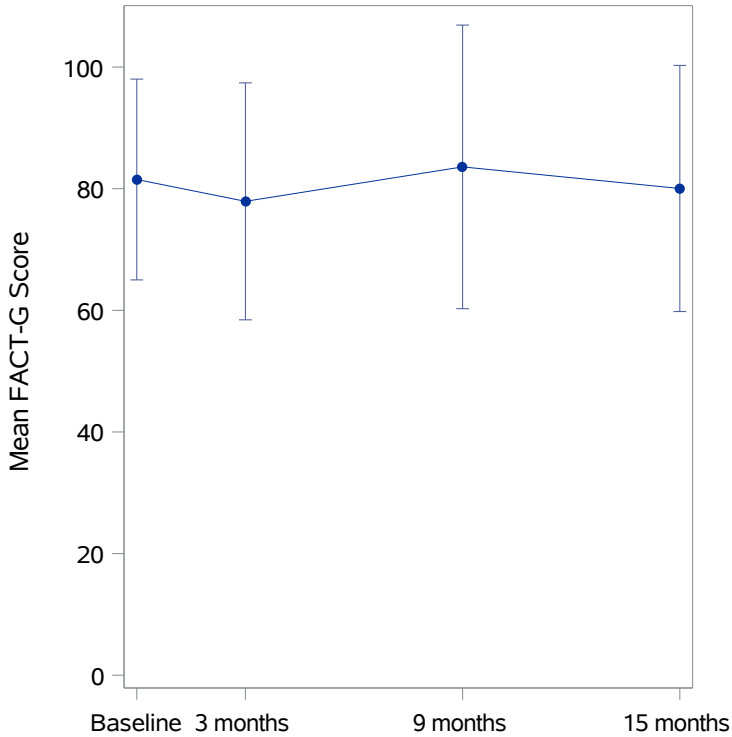

Mean Physical Well-Being (PWB) Score

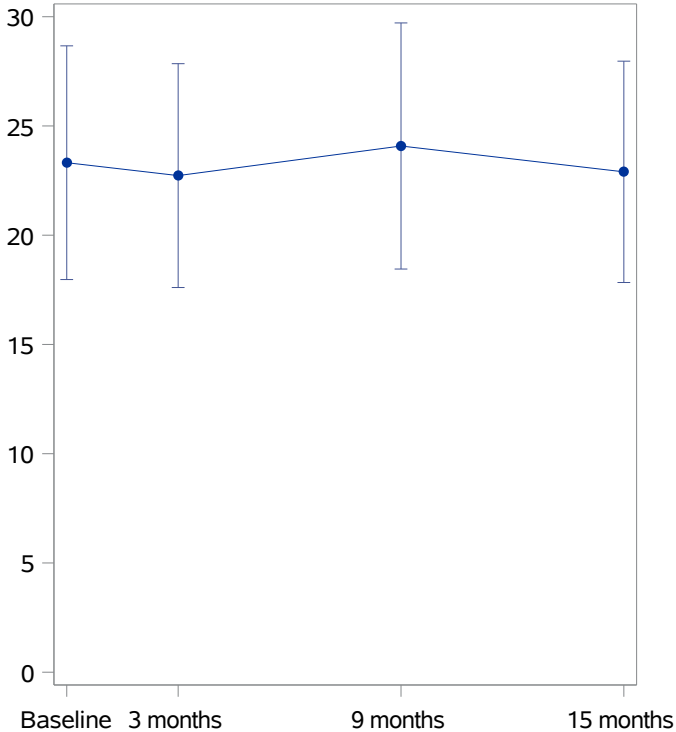

Mean Social/Family Well-Being (SWB) Score

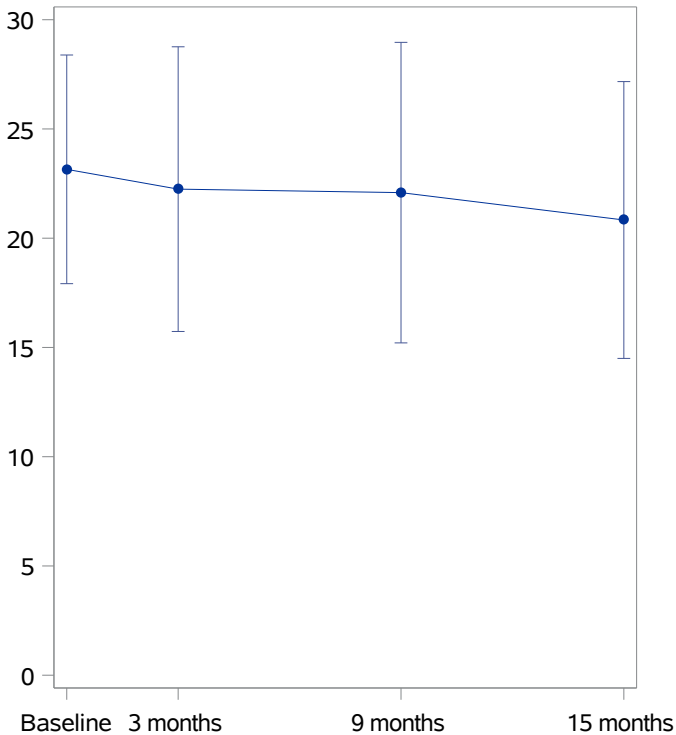

Mean Emotional Well-Being (EWB) Score

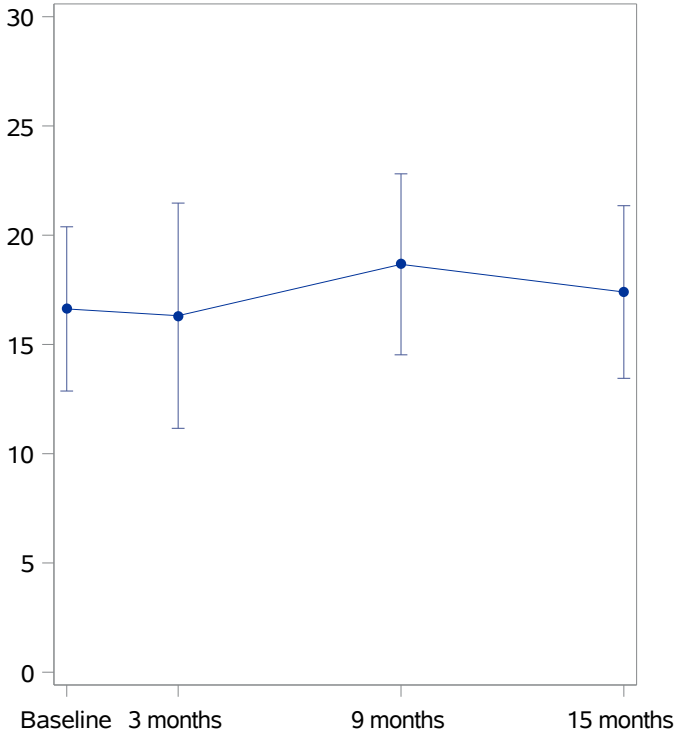

Mean Functional Well-Being (FWB) Score

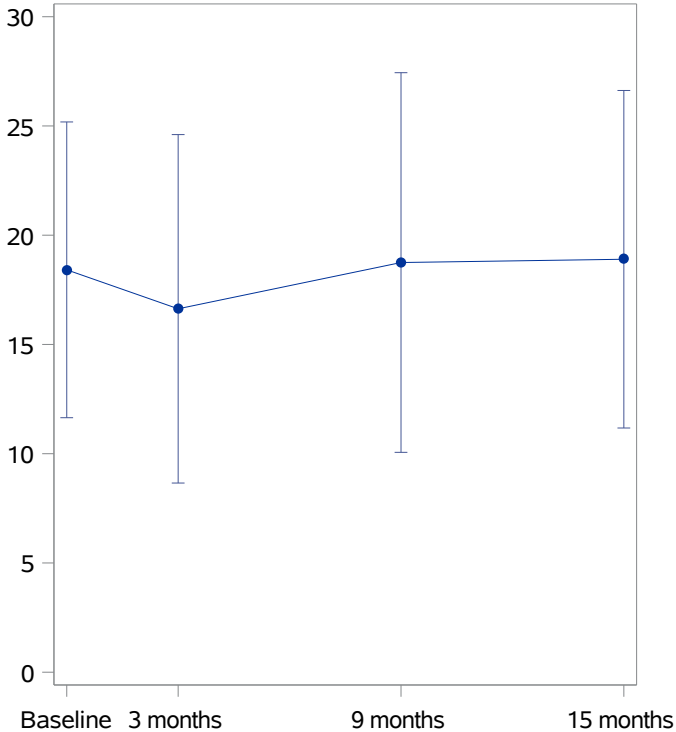

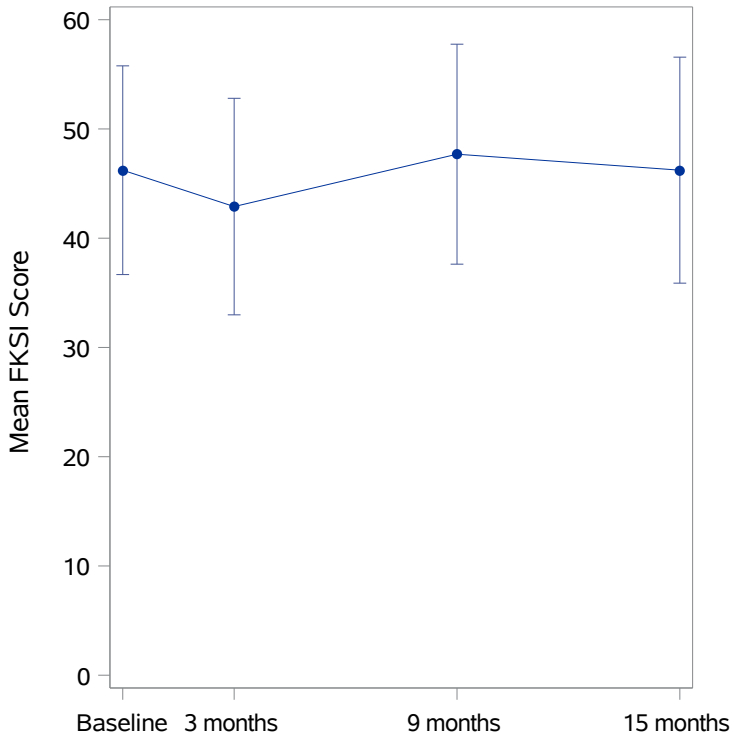

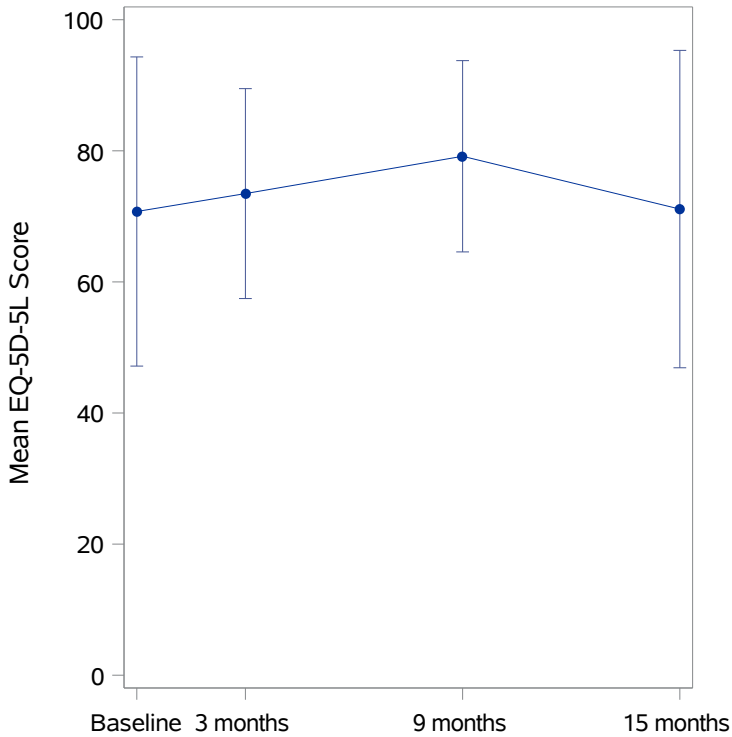

Supplement: NIHMS1860193-supplement-Supplemental_Figure_1.pdf [file NIHMS1860193-supplement-Supplemental_Figure_1.pdf]
